# Supplementary material for: Evaluation of blood MSI burden dynamics to trace immune checkpoint inhibitor therapy efficacy through the course of treatment
Source: PubMed Central journal article supplement — Sci Rep. 2024 Oct 8;14:23454. doi: 10.1038/s41598-024-73952-1 (PMC11461614; doi:10.1038/s41598-024-73952-1), 2024-10-08
Supplement: 41598_2024_73952_MOESM3_ESM.pdf [file 41598_2024_73952_MOESM3_ESM.pdf]

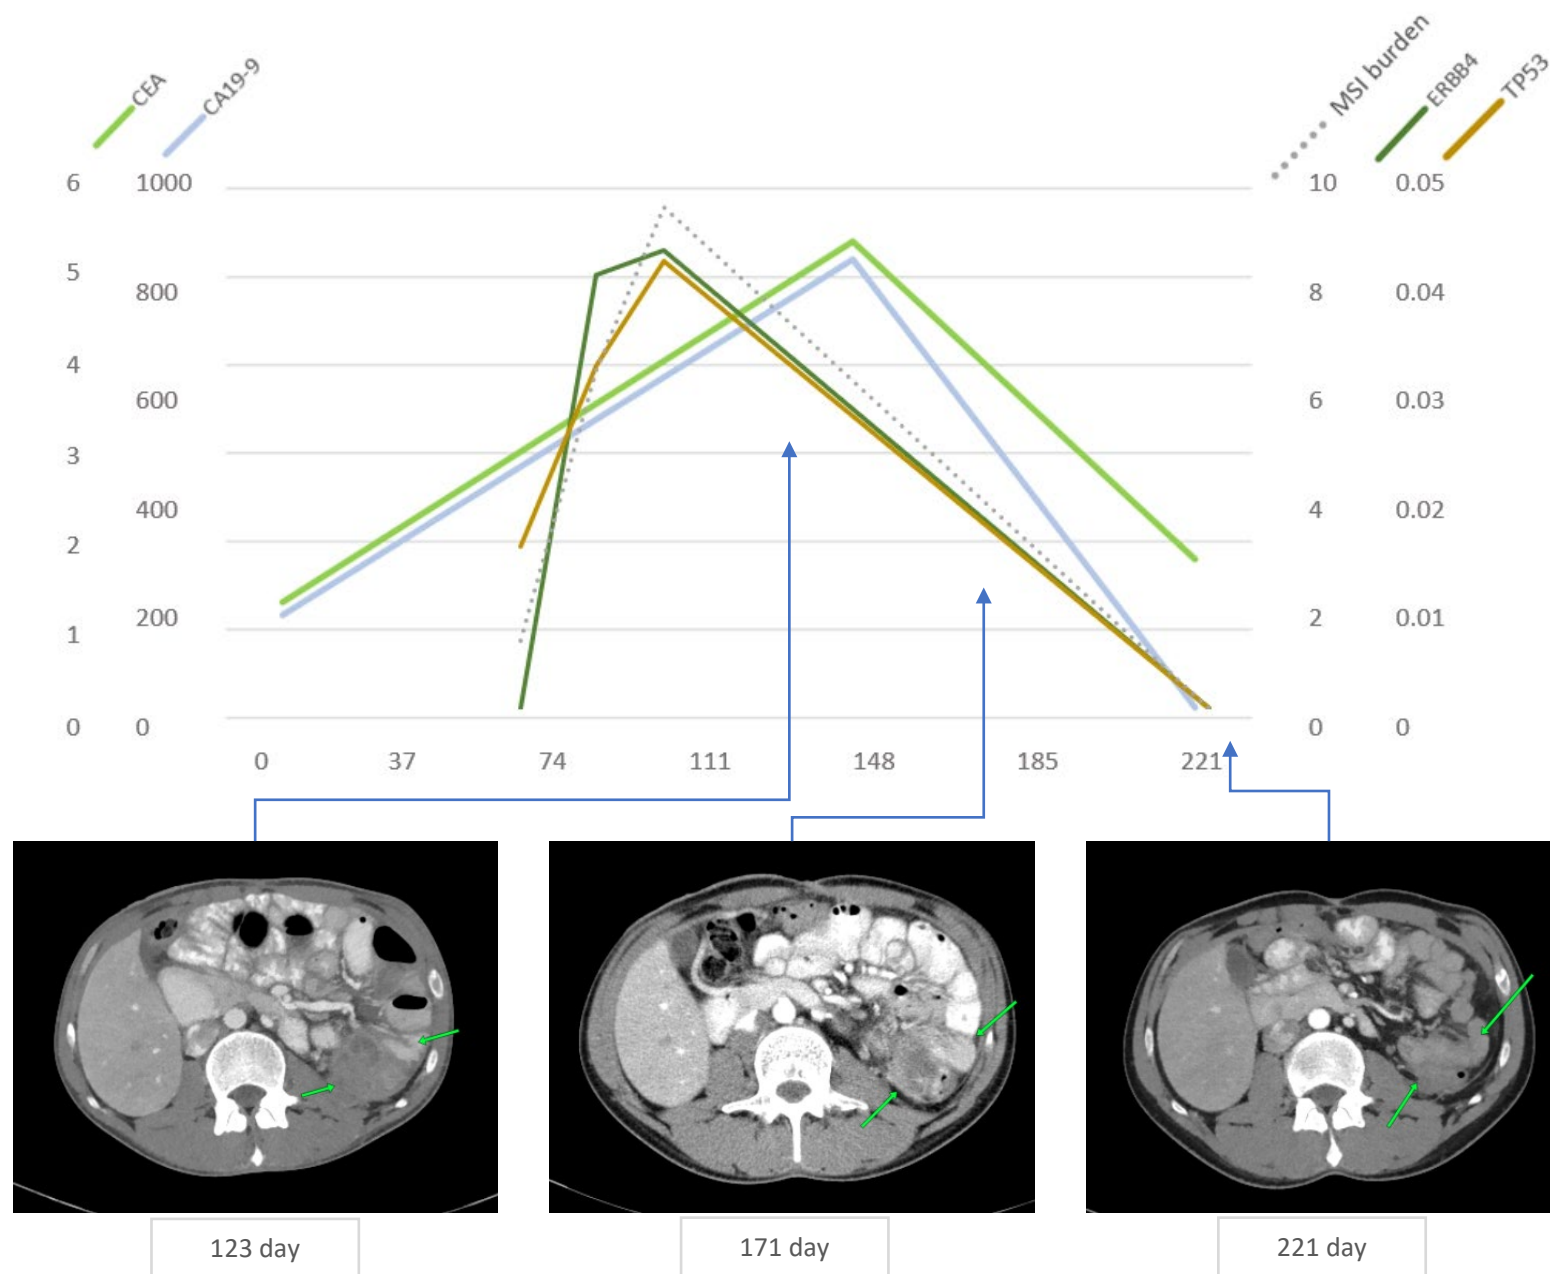

Fig.S2 Dynamics of tumor markers, MSI burden, mutational VAFs in the blood plasma, and changes in tumor volume during the course of treatment in Case 1.
